# Supplementary material
Source: publisher site journal article supplement (https://www.dovepress.com/article/292188)
Supplement: Supplementary file 1 [file get_supplementary_file.php]

**Supplementary**

Clinics and hospitals that participated with the research

Horie Internal Medicine and Respiratory Clinic, Takahashi Medical Clinic, Endo Clinic, Goto Medical Clinic, Himeno Clinic, Ito Clinic, Wada Clinic, Fukuda Clinic,Ogi Clinic, Hashinami Clinic, Kijima Clinic, Ueno Clinic, Sugiura Clinic, Watanabe Clinic, Shimizu Clinic, Ottachisatoie Clinic, Jinjyu Sojiki Clinic, Jinjyu Kawamoto Clinic, Matsumoto Clinic, Kono Clinic, Nakada Clinic, Gobara Urology Clinic, Yamamoto Internal Medicine Clinic, Amakawa Clinic, Itsuka Clinic, Nishio Clinic, Honda Clinic, Suyama Clinic, Matsumoto Clinic, Tibumura Clinic, Handa Clinic, Wazaki Clinic, Iwamoto Internal Medicine Clinic, Nakamura Clinic, Yashige Internal Medicine and Ophthalmology Clinic, Okuma Clinic, Nakamura Respiratory Clinic, Koike Clinic, Ota Clinic, Okita Internal Medicine Clinic, Kanzaki Internal Medicine Clinic, Kitamura Internal Medicine Clinic, Goto Internal Medicine Clinic, Suda Clinic, Sutani Clinic, Tai Clinic, Takahashi Internal Medicine Clinic, Tabe Clinic, Tsuma Clinic, Nagao Clinic,　Nishimura Clinic, Nichihara Clinic, Kumura Clinic Oda Branch, Fukada Clinic, Furuse Clinic, Hoshigaoka Clinic, Horie Clinic, Honnagase Clinic, Yamaoka Clinic, Yamamoto Gastroenterology Clinic, Yamane Hospital, Nishikawa Hospital, Shimada Hospital, Kasada Hospital, Ohchi Municipal Hospital, Kato Hospital, Kobayashi Hospital, Jusei Hospital, Heisei Memorial Hospital, Matsue Seikyo General Hospital, Okidozen Hospital, Oki Hospital, National Hospital Organization Hamada Medical Center, Masuda Regional Medical Center Medical Association Hospital, Western Shimane Mental and Physical Disabilities Medical Welfare Center, Shimaneken Saiseikai Gotsu General Hospital, Izumo Citizens Hospital, Shimane University Hospital
